# Supplementary material for: Inhibited corrosion-promotion activity of graphene encapsulated in nanosized silicon oxide
Source: Royal Society of Chemistry journal article supplement (doi:10.1039/c5ta04236d), 2015-01-01
Supplement: c5ta04236d1.pdf [file c5ta04236d1.pdf]

## Supplementary Material

# **Inhibited corrosion-promotion activity of graphene encapsulated in nanosized silicon oxide**

*Wen Sun,<sup>a</sup> Lida Wang,<sup>a</sup> Tingting Wu,<sup>b</sup> Yanqiu Pan,<sup>a</sup> and Guichang Liu<sup>\*a</sup>*

*<sup>a</sup> Department of Chemical Engineering, School of Chemical Engineering,  
Dalian University of Technology, 2 Linggong Road, Dalian 116024, P. R.  
China*

*<sup>b</sup> State Key Lab of Fine Chemicals, Carbon Research Laboratory, Center for  
Nano Materials and Science, School of Chemical Engineering, Dalian  
University of Technology, 2 Linggong Road, Dalian 116024, P. R. China*

\*Correspondence. Tel. / Fax: 86-411-84986047.

E-mail: [gchliu@dlut.edu.cn](mailto:gchliu@dlut.edu.cn) (Guichang Liu).

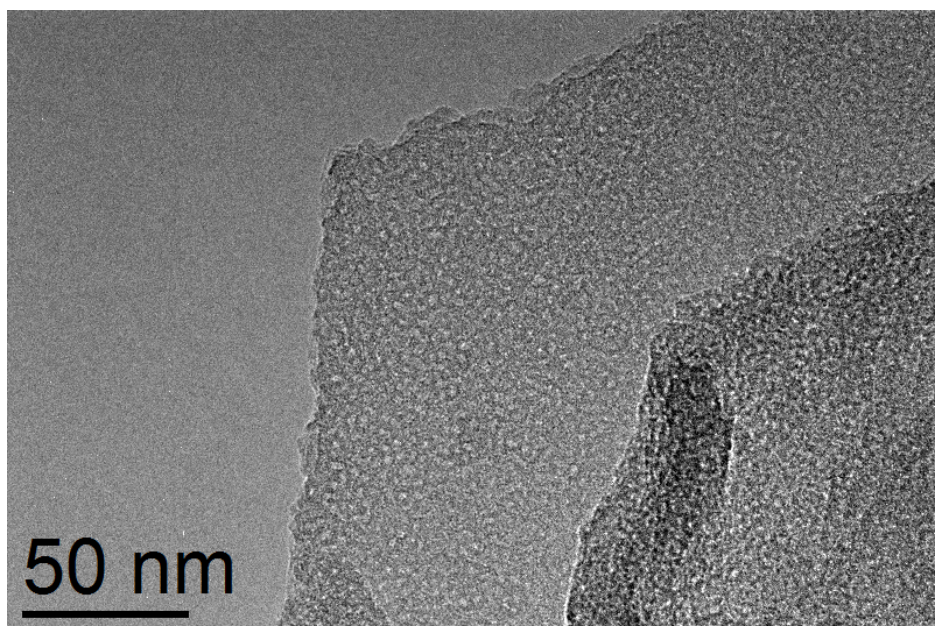

**Figure S1.** Magnified TEM image shows GSs have a mesoporous structure

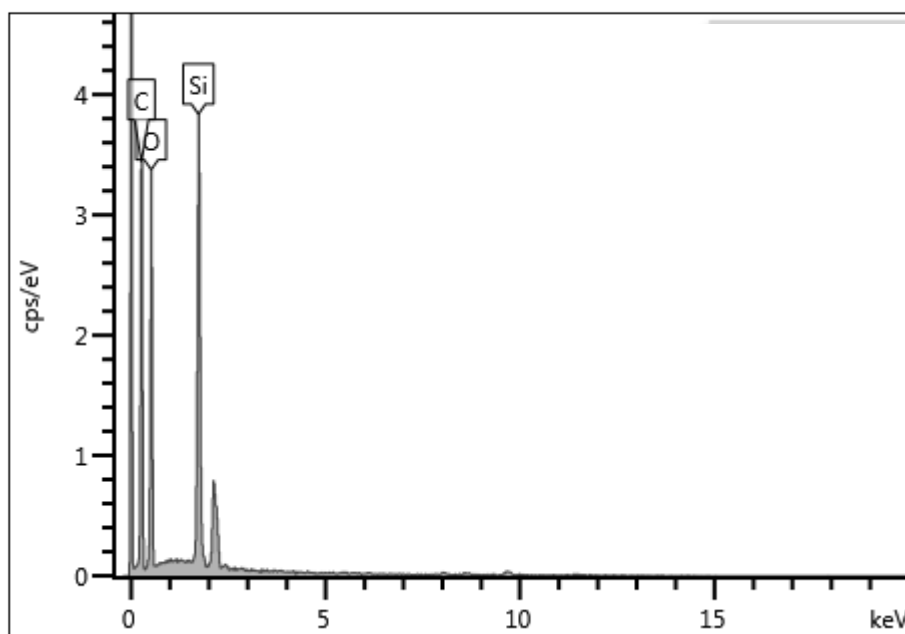

**Figure S2.** EDX spectrum of GSs

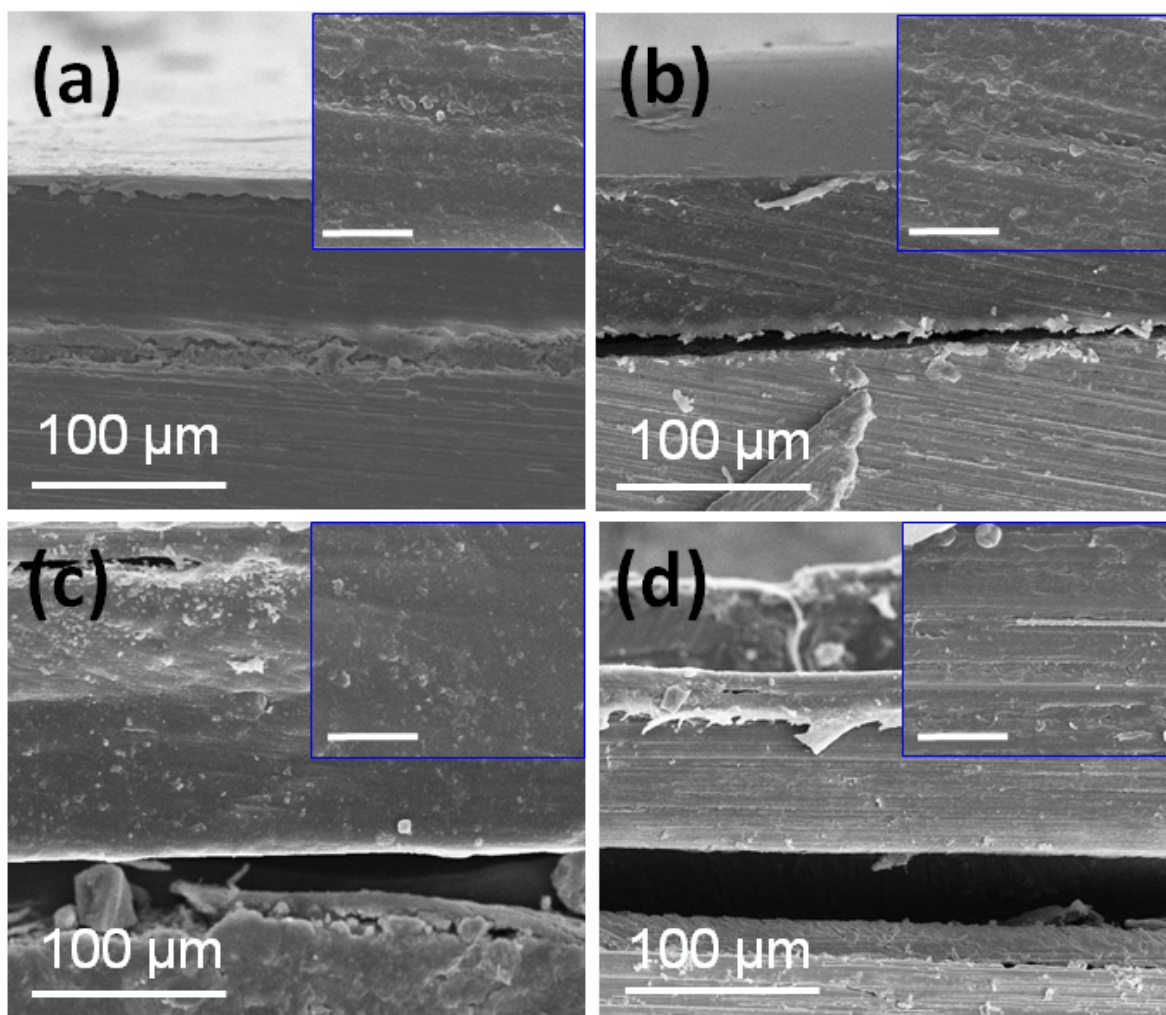

**Figure S3.** SEM images of cross-section of (a)  $GS_{0.025}$ , (b)  $GS_{0.05}$ , (c)  $GAP_{0.15}$  and (d)  $GAP_{0.2}$ . Inset: Magnified SEM images of cross-section (bar=10  $\mu m$ ).

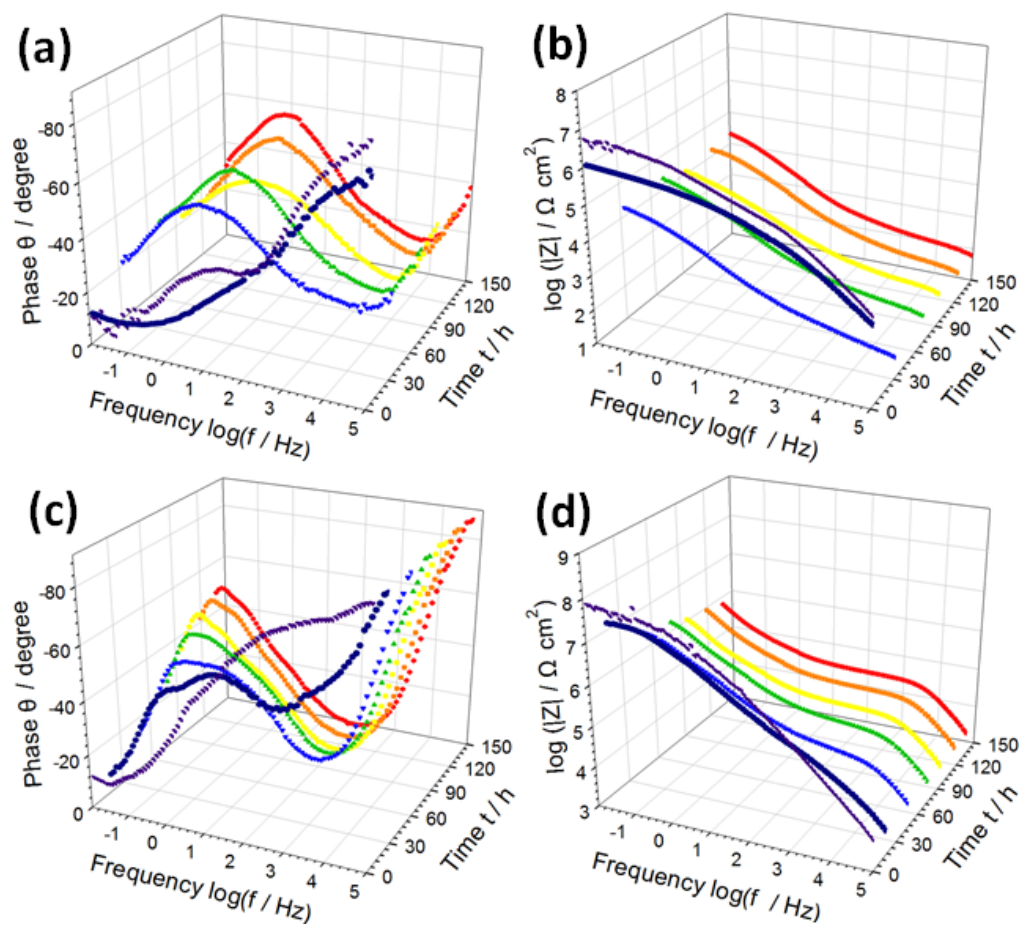

**Figure S4.** Bode plots of different PVB coating systems reinforced with (a)(b)  $\text{SiO}_2$  nanoparticles and (c)(d) the mixture of  $\text{SiO}_2$  and rGO.



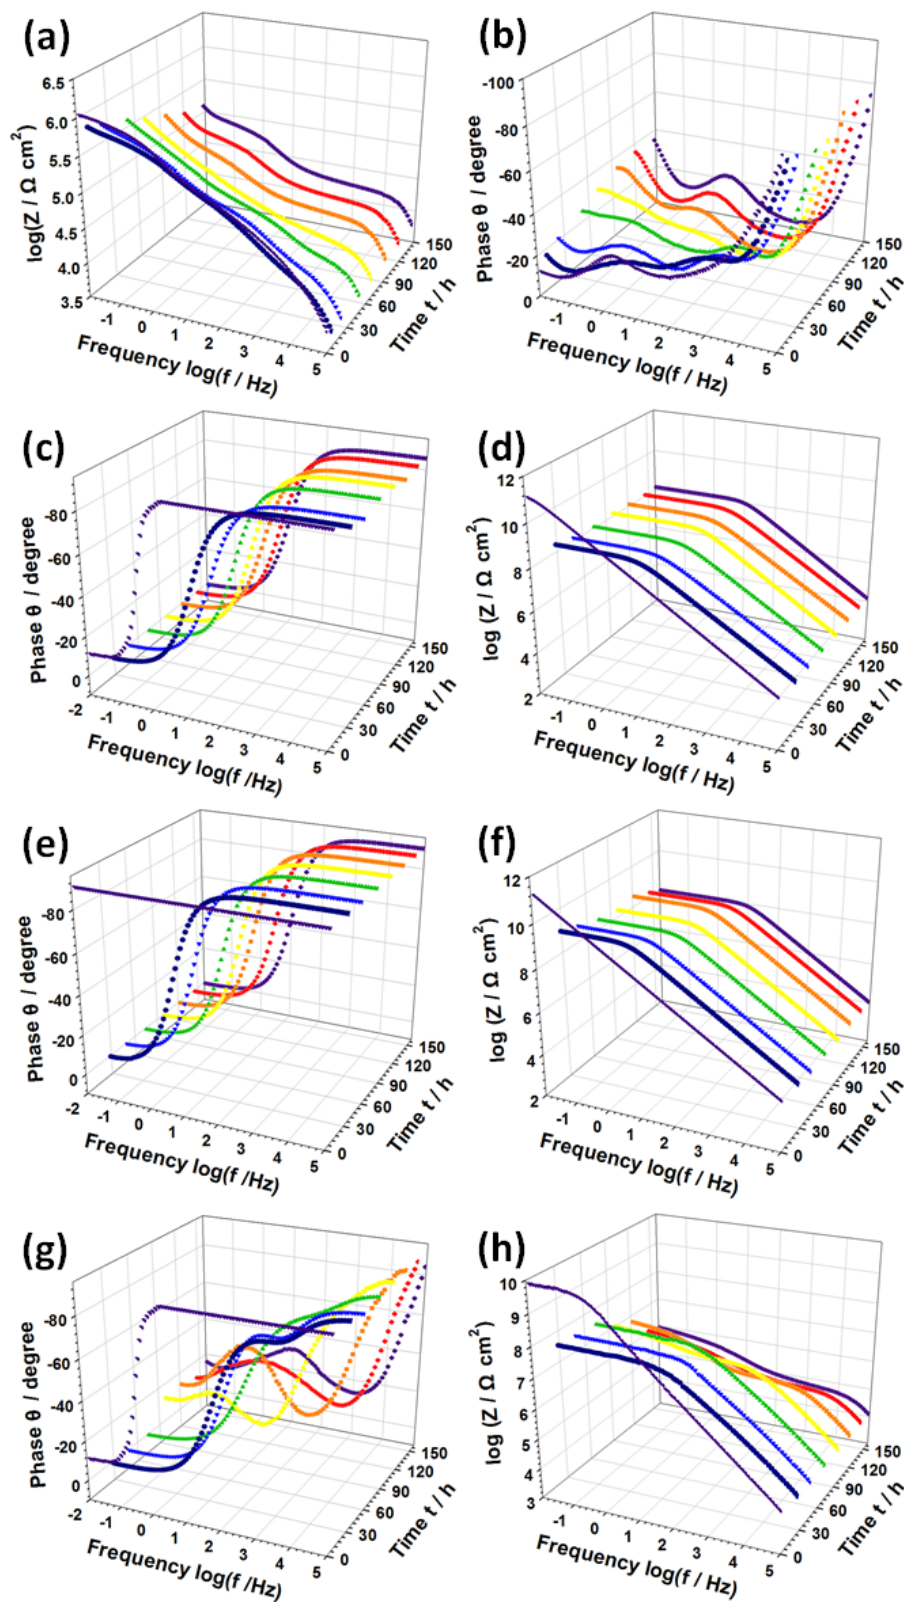

**Figure S5.** Bode plots of different coating systems. (a)(b)  $GS_{0.025}$ , (c)(d)  $GS_{0.05}$ , (e)(f)  $GS_{0.15}$ , (g)(h)  $GS_{0.2}$

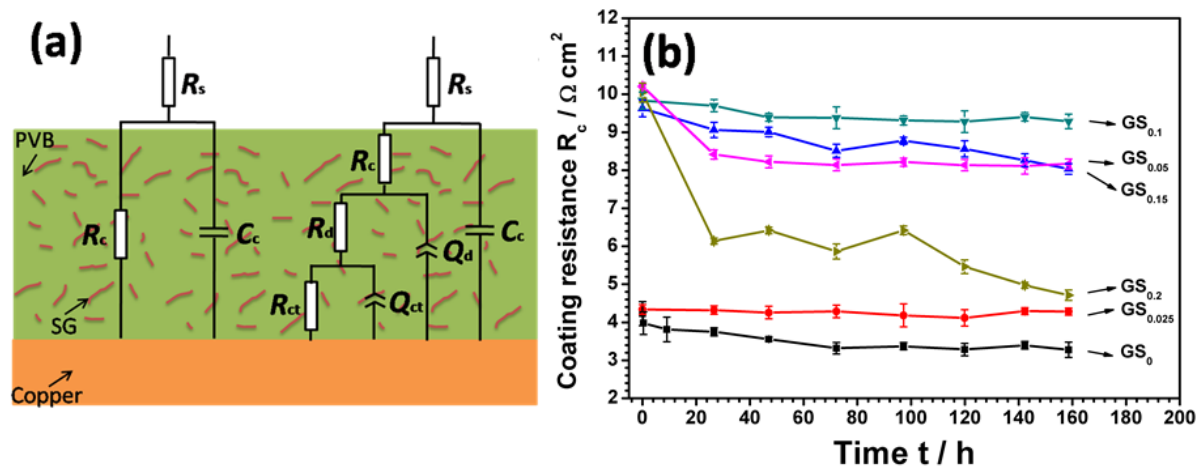

**Figure S6.** (a) Equivalent circuits. The circuit on the left is suitable for a coating with high anticorrosion performance, while the one on the right can be applied to fit the results of a failed coating. (b) The fitting results of the coating resistances of different coatings.

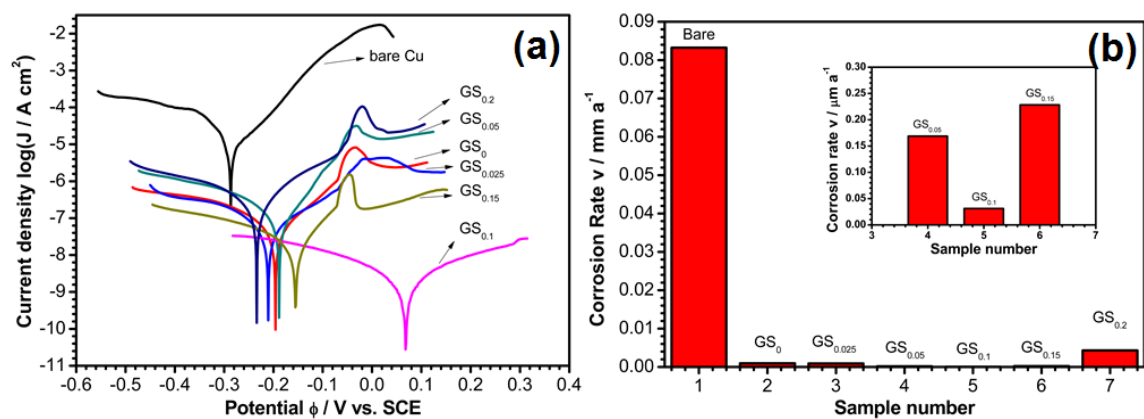

**Figure S7.** Polarization curves of different coatings after immersing in 3.5 wt.% NaCl aqueous solution for 1 day. (a) Polarization curves. (b) Calculated corrosion rates.



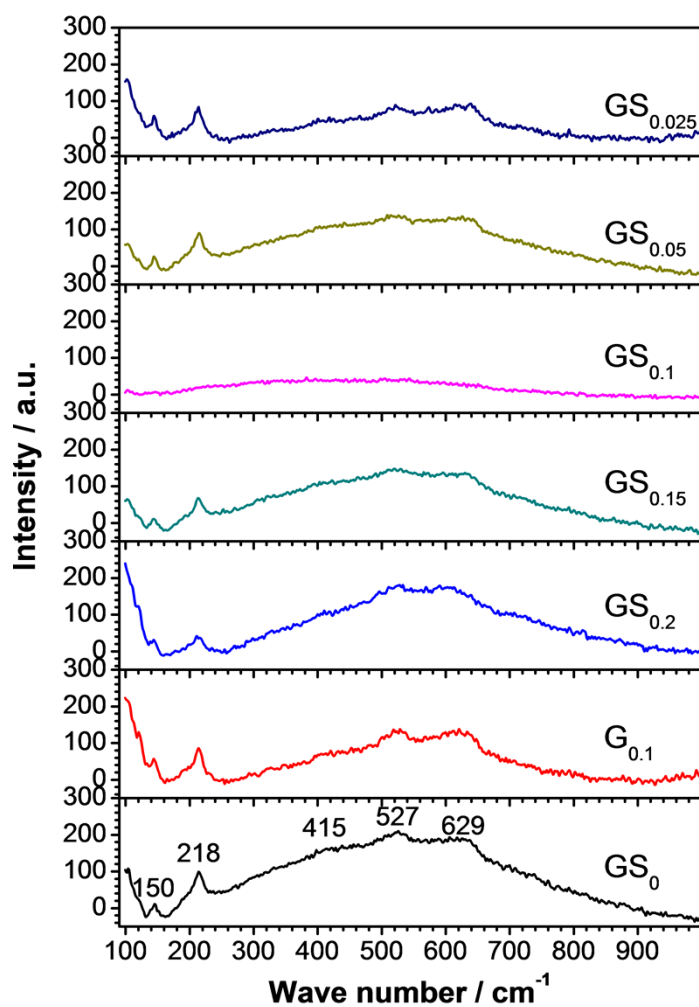

**Figure S8.** Raman spectra of the copper substrates beneath different coatings

## References

- 1 W. S. Hummers and R. E. Offeman, *J. Am. Chem. Soc.*, 1958, **80**, 1339.
- 2 S. Yang, X. Feng, L. Wang, K. Tang, J. Maier and K. Mullen, *Angew. Chem. Int. Edit.*, 2010, **49**, 4795.
- 3 Y. Du, S. Guo, S. Dong and E. Wang, *Biomaterials*, 2011, **32**, 8584.
